# Supplementary material for: The application of tetramethylammonium hydroxide for generating atmospheric pressure glow discharge in contact with alkalized flowing liquid cathode solutions – evaluation of the analytical performance
Source: Royal Society of Chemistry journal article supplement (doi:10.1039/d1ja00148e), 2021-01-01
Supplement: d1ja00148e1.pdf [file d1ja00148e1.pdf]

*Supporting Information*

**The application of tetramethylammonium hydroxide for generating atmospheric pressure glow discharge in contact with alkalized flowing liquid cathode solutions – evaluation of analytical performance**

Monika Gorska\*, Pawel Pohl

*Wroclaw University of Science and Technology, Faculty of Chemistry, Division of Analytical Chemistry and Chemical Metallurgy, Wybrzeze Stanislawo Wyspianskiego 27, 50-370 Wroclaw, Poland*

\* Corresponding author. E-mail address: monika.gorska@pwr.edu.pl (Monika Gorska)

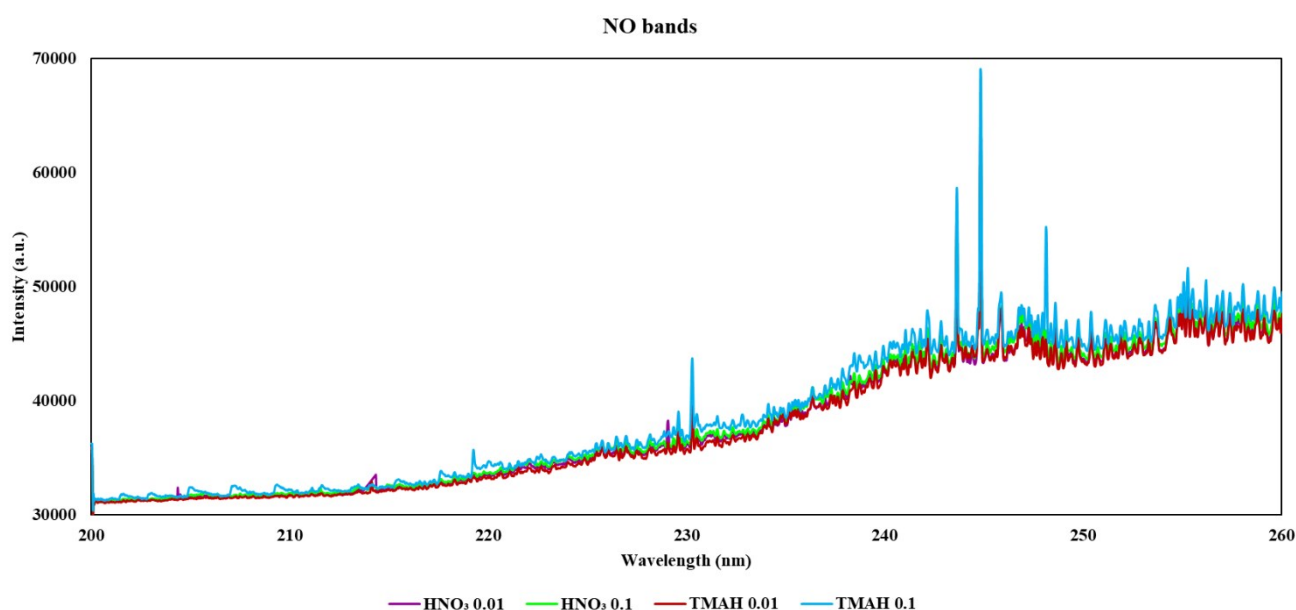

Fig. SI-1. The emission spectra of the FLC-APGD system for different supporting electrolytes, recorded in the 200-260 nm range.

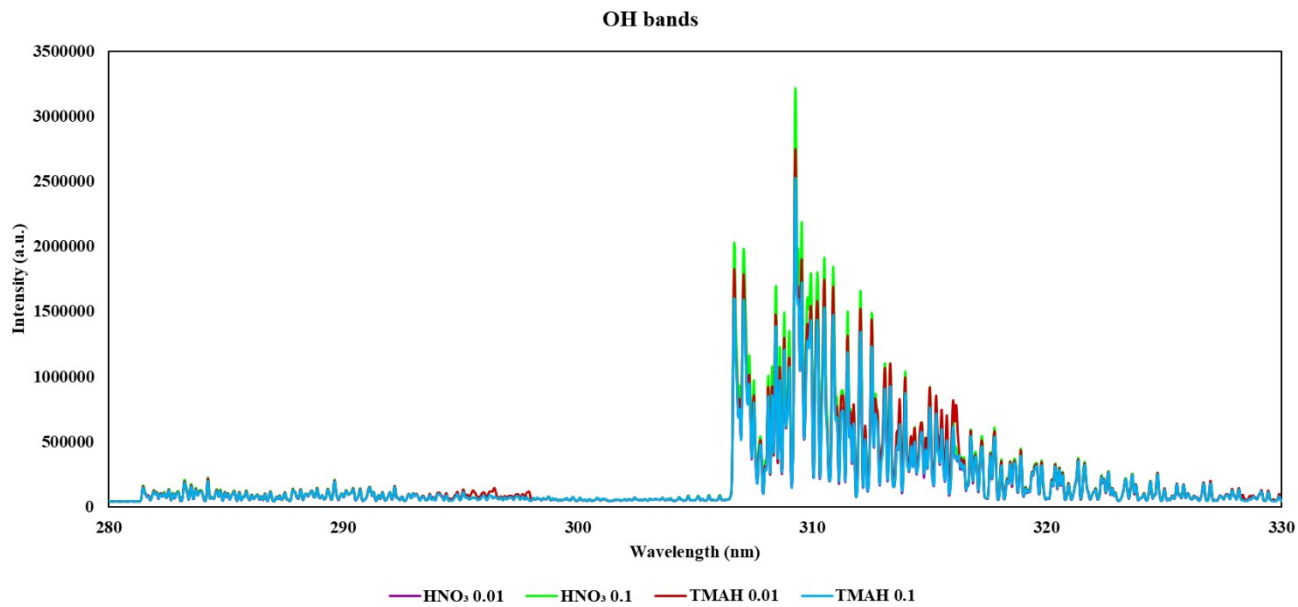

Fig. SI-2. The emission spectra of the FLC-APGD system for different supporting electrolytes, recorded in the 280-330 nm range.

### N<sub>2</sub> bands

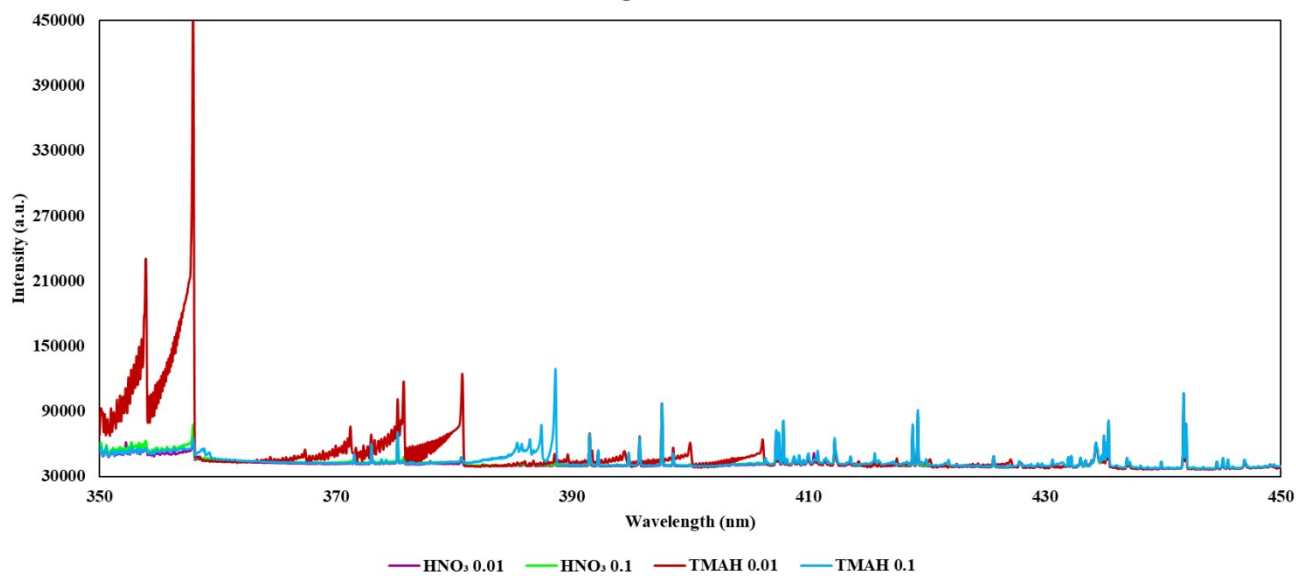

Fig. SI-3. The emission spectra of the FLC-APGD system for different supporting electrolytes, recorded in the 350-450 nm range.
